# Supplementary material
Source: Springer Nature journal article supplement (https://www.springermedizin.de/resource/supplementary/12873_2011_135_MOESM4_ESM.pdf/9431526)

# ABCDE-triage associated changes in numbers of monthly doctor visits of private sector GPs, May 2004-February 2008

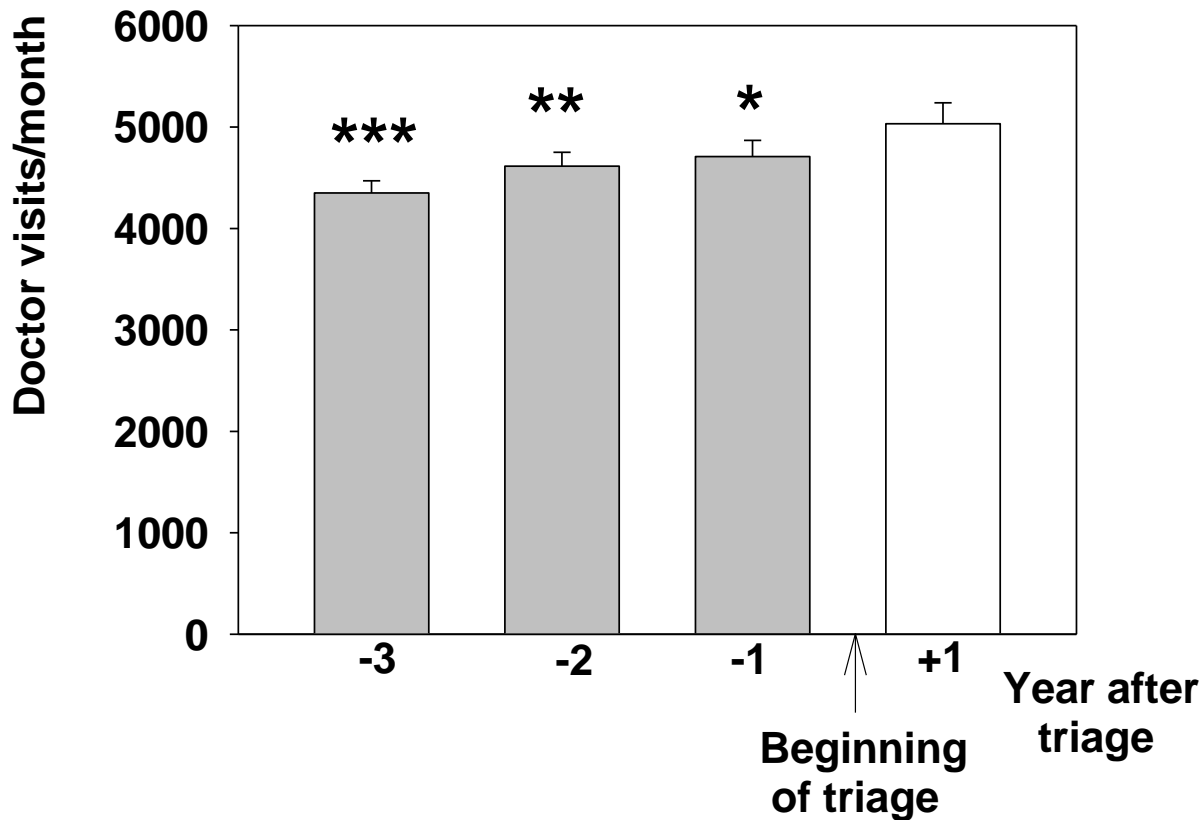

Supplement: MOESM4 [file 9431526]
